# Supplementary material for: Modelling of the influence of meteoric smoke particles on artificial heating in the D-region
Source: Copernicus journal article supplement (doi:10.5194/angeo-2021-39), 2021-07-20
Supplement: Supplementary file [file angeo-2021-39-AC2-supplement.pdf]

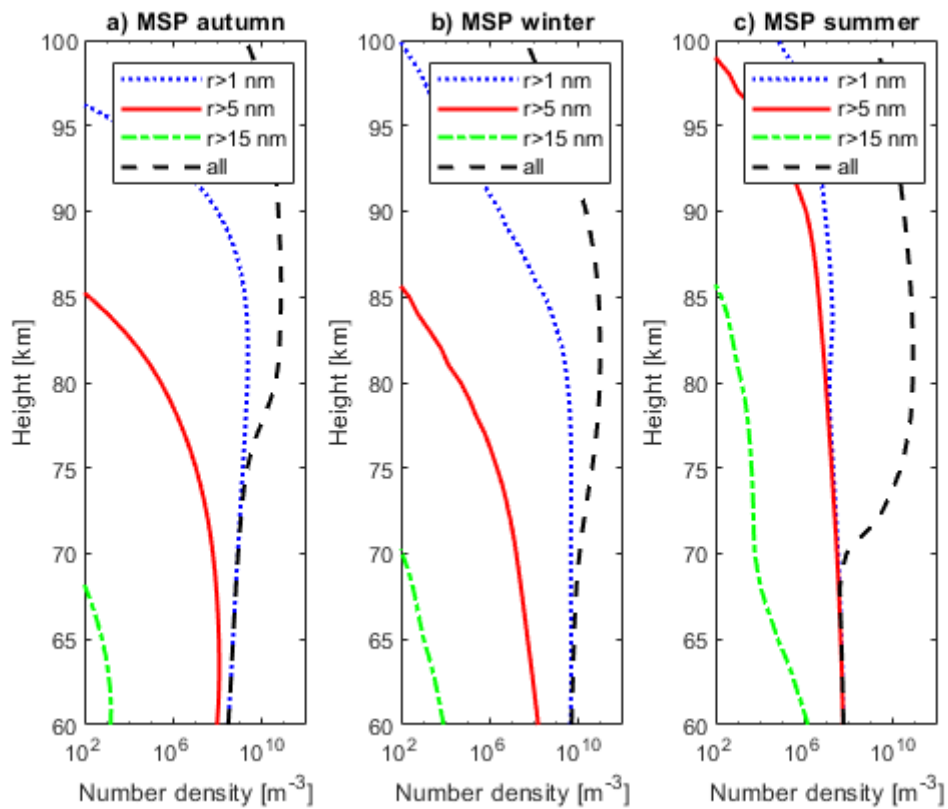

Figure A1: Different MSP number density profiles for a) the autumn case, b) the winter case and c) the summer case. The autumn case is from Megner et al. 2006, while the winter and summer case is from Megner et al. 2008.
